# Supplementary material for: Synergistic Antibacterial Effects of Meropenem in Combination with Aminoglycosides against Carbapenem-Resistant Escherichia coli Harboring blaNDM-1 and blaNDM-5
Source: MDPI journal article supplement (doi:10.3390/antibiotics10081023), 2021-08-23
Supplement: s1 [file s1]

### Supplementary Materials

**Table S1.** Screening for carbapenem resistance in 35 suspected carbapenem-resistant *Escherichia coli* isolates

| Clinical isolate | Code        | Source of isolation | MIC (µg/ml) |            |
|------------------|-------------|---------------------|-------------|------------|
|                  |             |                     | Imipenem    | Meropenem  |
| EC1              | 1PSUsep1R/2 | Rectal              | 0.25 (S)    | 0.25 (S)   |
| EC2              | 1PSU6R/2    | Rectal              | 0.25 (S)    | 0.0156 (S) |
| EC3              | 2PSU6R/1    | Rectal              | 64 (R)      | 64 (R)     |
| EC4              | 2PSU6R/2    | Rectal              | 64 (R)      | 64 (R)     |
| EC5              | 1HY4R/2     | Rectal              | 0.25 (S)    | 0.0156 (S) |
| EC6              | 1HY8R       | Rectal              | 128 (R)     | 128 (R)    |
| EC7              | 1HY13Th/1   | Throat              | 64 (R)      | 64 (R)     |
| EC8              | 1HY13R/1    | Rectal              | 64 (R)      | 64 (R)     |
| EC9              | 1SK1R/1     | Rectal              | 0.25 (S)    | 0.0156 (S) |
| EC10             | 2ST1R/1     | Rectal              | 0.25 (S)    | 0.0156 (S) |
| EC11             | 2ST4R/2     | Rectal              | 0.25 (S)    | 0.0156 (S) |
| EC12             | 2ST7R/1     | Rectal              | 0.25 (S)    | 0.003 (S)  |
| EC13             | 2ST7R/2     | Rectal              | 0.25 (S)    | 0.25 (S)   |
| EC14             | 1PT5R/1     | Rectal              | 32 (R)      | 64 (R)     |
| EC15             | 1PA5Th/1    | Throat              | 0.25 (S)    | 0.0156 (S) |
| EC16             | 1PA5E       | Environment         | 0.25 (S)    | 0.0156 (S) |
| EC17             | 1PA21Th/1   | Throat              | 128 (R)     | 128 (R)    |
| EC18             | 1PA21R      | Rectal              | 128 (R)     | 128 (R)    |
| EC19             | 1PA21E      | Environment         | 64 (R)      | 128 (R)    |
| EC20             | 2PA3R/1     | Rectal              | 0.25 (S)    | 0.0156 (S) |
| EC21             | 2PA3R/2     | Rectal              | 0.25 (S)    | 0.0156 (S) |
| EC22             | 2PA7R/1     | Rectal              | 0.5 (S)     | 0.0156 (S) |
| EC23             | 2PA9R/1     | Rectal              | 0.25 (S)    | 0.0156 (S) |
| EC24             | 2PA21R/1    | Rectal              | 64 (R)      | 128 (R)    |

|      |       |       |          |            |
|------|-------|-------|----------|------------|
| EC25 | SK018 | Blood | 32 (R)   | 64 (R)     |
| EC26 | SK019 | Blood | 0.5 (S)  | 0.0156 (S) |
| EC27 | SK020 | Blood | 0.25 (S) | 0.0156 (S) |
| EC28 | SK021 | Blood | 64 (R)   | 128 (R)    |
| EC29 | TR003 | Blood | 32 (R)   | 128 (R)    |
| EC30 | PT024 | Blood | 16 (R)   | 32 (R)     |
| EC31 | PT033 | Blood | 64 (R)   | 128 (R)    |
| EC32 | PT048 | Blood | 64 (R)   | 128 (R)    |
| EC33 | PT051 | Blood | 64 (R)   | 128 (R)    |
| EC34 | NT002 | Blood | 64 (R)   | 128 (R)    |
| EC35 | NT004 | Blood | 128 (R)  | 32 (R)     |

---

R, resistant; S, susceptible

**Table S2.** Clinical information and outcome of patients in 19 carbapenem-resistant *Escherichia coli* (CREC) isolates.

| Isolate        | Code                 | Hospital                  | Source of isolation | Sex | Age | Initial ward     | Underlying disease          | Previous use of antibiotics |
|----------------|----------------------|---------------------------|---------------------|-----|-----|------------------|-----------------------------|-----------------------------|
| CREC1<br>CREC2 | 2PSU6R/1<br>2PSU6R/2 | Songklanagarind           | Rectal              | M   | 73  | ICU medicine     | DM, HTN, DLD, CVA, CAD, CKD | CRO, IMP                    |
| CREC3          | 1HY8R                | Hatyai                    | Rectal              | M   | 63  | ICU medicine     | HTN, CKD                    | CRO, MEM                    |
| CREC4          | 1HY13Th/1            | Hatyai                    | Throat              | F   | 59  | ICU surgery      | DM, CVA, CAD                | CRO, ETP                    |
| CREC5          | 1HY13R/1             | Hatyai                    | Rectal              |     |     |                  |                             |                             |
| CREC6          | 1PT5R/1              | Phatthalung               | Rectal              | M   | 48  | ICU medicine     | HTN, DLD, CKD               | CRO, CAZ, PIP/TAZ. IMP      |
| CREC7          | 1PA21Th/1            | Pattani                   | Throat              | M   | 84  | General medicine | DLD, CVA, CAD               | CAZ, MEM                    |
| CREC8          | 1PA21R               | Pattani                   | Rectal              |     |     |                  |                             |                             |
| CREC9          | 1PA21E               | Pattani                   | Environment         |     |     |                  |                             |                             |
| CREC10         | 2PA21R/1             | Pattani                   | Rectal              | M   | 47  | General medicine | CAD                         | CRO, PIP/TAZ                |
| CREC11         | SK018                | Songkhla                  | Blood               | M   | 61  | General medicine | COPD                        | CRO, AZM, PIP/TAZ           |
| CREC12         | SK021                | Songkhla                  | Blood               |     |     |                  |                             |                             |
| CREC13         | TR003                | Trang                     | Blood               | F   | 46  | General surgery  | HTN, CVA, CKD               | CRO, LVX, ETP               |
| CREC14         | PT024                | Pattani                   | Blood               | F   | 52  | ICU surgery      | CKD, COPD                   | CRO, IMP                    |
| CREC15         | PT033                | Pattani                   | Blood               | M   | 36  | General medicine | HTN, CKD                    | CAZ, LVX, MEM               |
| CREC16         | PT048                | Pattani                   | Blood               | M   | 37  | ICU medicine     | DM, CKD                     | CRO, PIP/TAZ, IMP           |
| CREC17         | PT051                | Pattani                   | Blood               | M   | 41  | ICU surgery      | CAD, CKD                    | LVX, IMP                    |
| CREC18         | NT002                | Naradhiwas Rajanagarindra | Blood               | F   | 65  | General surgery  | DM                          | CRO, LVX, IMP               |

|        |       |                           |       |   |    |                  |          |          |
|--------|-------|---------------------------|-------|---|----|------------------|----------|----------|
| CREC19 | NT004 | Naradhiwas Rajanagarindra | Blood | F | 49 | General medicine | HTN, CKD | CRO, MEM |
|--------|-------|---------------------------|-------|---|----|------------------|----------|----------|

AZM, azithromycin; CAD, coronary artery disease; CAZ, ceftazidime; CKD, chronic kidney disease; COPD, chronic obstructive pulmonary disease; CRO, ceftriaxone; CVA, cerebrovascular disease; DM, diabetes mellitus; DLD, dyslipidemia; ETP, ertapenem; HTN, hypertension; IMP, imipenem; LVX, levofloxacin; MEM, meropenem; PIP/TAZ, piperacillin/tazobactam.

**Table S3.** Minimum inhibitory concentrations of antimicrobial agents against the 19 carbapenem-resistant *Escherichia coli* isolates

| Clinical isolate | Minimum inhibitory concentration (µg/ml) |                             |                |             |                 |              |                |             | colistin | fosfomycin |
|------------------|------------------------------------------|-----------------------------|----------------|-------------|-----------------|--------------|----------------|-------------|----------|------------|
|                  | β-lactam<br>+ β-lactamase inhibitor      |                             | Cephalosporins |             | Fluoroquinolone |              | Glycylcyclines |             |          |            |
|                  | cefoperazone<br>+ sulbactam              | ceftolozane<br>+ tazobactam | cefotaxime     | ceftazidime | ciprofloxacin   | levofloxacin | tigecycline    | minocycline |          |            |
| CREC1            | 512 (R)                                  | >1024 (R)                   | >1024 (R)      | >1024 (R)   | 64 (R)          | 32 (R)       | 1 (R)          | <2 (S)      | 0.5 (S)  | 16 (S)     |
| CREC2            | 512 (R)                                  | >1024 (R)                   | >1024 (R)      | >1024 (R)   | 128 (R)         | 32 (R)       | 1 (R)          | <2 (S)      | 2 (S)    | 16 (S)     |
| CREC3            | 32 (S)                                   | 4 (S)                       | 256 (R)        | 1024 (R)    | 4 (R)           | <0.5 (S)     | 2 (R)          | <2 (S)      | 1 (S)    | 64 (S)     |
| CREC4            | >1024 (R)                                | >1024 (R)                   | >1024 (R)      | >1024 (R)   | 128 (R)         | 16 (R)       | 0.5 (S)        | 16 (R)      | 0.5 (S)  | 16 (S)     |
| CREC5            | >1024 (R)                                | >1024 (R)                   | >1024 (R)      | >1024 (R)   | 128 (R)         | 16 (R)       | 1 (R)          | <2 (S)      | 0.5 (S)  | 16 (S)     |
| CREC6            | 512 (R)                                  | >1024 (R)                   | >1024 (R)      | >1024 (R)   | 0.5 (S)         | <0.5 (S)     | 0.5 (S)        | <2 (S)      | 0.5 (S)  | 16 (S)     |
| CREC7            | >1024 (R)                                | >1024 (R)                   | >1024 (R)      | >1024 (R)   | 2 (I)           | 2 (S)        | 2 (R)          | 8 (I)       | 0.5 (S)  | 16 (S)     |
| CREC8            | >1024 (R)                                | >1024 (R)                   | >1024 (R)      | >1024 (R)   | 4 (R)           | 1 (S)        | 2 (R)          | 4 (S)       | 2 (S)    | 16 (S)     |
| CREC9            | >1024 (R)                                | >1024 (R)                   | >1024 (R)      | >1024 (R)   | 2 (I)           | 1 (S)        | 2 (R)          | 8 (I)       | 0.5 (S)  | 16 (S)     |
| CREC10           | >1024 (R)                                | >1024 (R)                   | >1024 (R)      | >1024 (R)   | 64 (R)          | 32 (R)       | 1 (R)          | 4 (S)       | 1 (S)    | 16 (S)     |
| CREC11           | 512 (R)                                  | >1024 (R)                   | >1024 (R)      | >1024 (R)   | 128 (R)         | 16 (R)       | 4 (R)          | <2 (S)      | 0.25 (S) | 16 (S)     |
| CREC12           | >1024 (R)                                | >1024 (R)                   | >1024 (R)      | >1024 (R)   | 64 (R)          | 8 (R)        | 2 (R)          | <2 (S)      | 0.25 (S) | 16 (S)     |
| CREC13           | >1024 (R)                                | >1024 (R)                   | 256 (R)        | >1024 (R)   | 128 (R)         | 8 (R)        | 2 (R)          | <2 (S)      | 0.5 (S)  | 16 (S)     |
| CREC14           | >1024 (R)                                | >1024 (R)                   | >1024 (R)      | >1024 (R)   | 16 (R)          | 8 (R)        | 0.06 (S)       | 8 (I)       | 1 (S)    | 16 (S)     |
| CREC15           | 256 (R)                                  | >1024 (R)                   | >1024 (R)      | >1024 (R)   | 128 (R)         | 8 (R)        | 0.25 (S)       | <2 (S)      | 1 (S)    | 16 (S)     |

|        |         |           |           |           |         |        |       |        |         |          |
|--------|---------|-----------|-----------|-----------|---------|--------|-------|--------|---------|----------|
| CREC16 | 512 (R) | >1024 (R) | >1024 (R) | >1024 (R) | 256 (R) | 32 (R) | 2 (R) | 16 (R) | 1 (S)   | 32 (S)   |
| CREC17 | 512 (R) | >1024 (R) | >1024 (R) | >1024 (R) | 256 (R) | 32 (R) | 2 (R) | 16 (R) | 0.5 (S) | 16 (S)   |
| CREC18 | 512 (R) | >1024 (R) | >1024 (R) | >1024 (R) | 512 (R) | 64 (R) | 2 (R) | <2 (S) | 0.5 (S) | 1024 (R) |
| CREC19 | 512 (R) | >1024 (R) | >1024 (R) | >1024 (R) | 256 (R) | 16 (R) | 4 (R) | <2 (S) | 1 (S)   | 1024 (R) |

R, resistant; I, intermediate; S, susceptible.

**Table S4.** Summary of the synergistic effects of meropenem in combination with aminoglycosides against 19 carbapenem-resistant *Escherichia coli*.

| Combination              | Outcomes      |                  |
|--------------------------|---------------|------------------|
|                          | Synergism (%) | Indifference (%) |
| meropenem + amikacin     | 13 (68.4)     | 6 (31.6)         |
| meropenem + gentamicin   | 16 (84.2)     | 3 (15.8)         |
| meropenem + kanamycin    | 15 (78.9)     | 4 (21.1)         |
| meropenem + streptomycin | 16 (84.2)     | 3 (15.8)         |
| meropenem + tobramycin   | 15 (78.9)     | 4 (21.1)         |
